# Supplementary material for: Targeted Delivery Prodigiosin to Choriocarcinoma by Peptide-Guided Dendrigraft Poly-l-lysines Nanoparticles
Source: PubMed Central journal article supplement (PMC6862698; doi:10.3390/ijms20215458), 2019-11-01
Supplement: ijms-20-05458-s001.pdf [file ijms-20-05458-s001.pdf]

## Targeted Delivery Prodigiosin to Choriocarcinoma by Peptide-Guided Dendrigrraft Poly-l-lysines

### Nanoparticles

Kai Zhao <sup>1,2,\*</sup>, Dan Li <sup>1,2,3,4</sup>, Guogang Cheng <sup>2,3</sup>, Baozhen Zhang <sup>3</sup>, Jinyu Han <sup>2,3,5</sup>, Jie Chen <sup>3</sup>, Baobei

Wang <sup>3</sup>, Mengxia Li <sup>3</sup>, Tianxia Xiao <sup>3</sup>, Jian Zhang <sup>3</sup>, Dongpo Zhou <sup>1,2</sup>, Zheng jin <sup>5</sup>, Xiujun Fan <sup>3,\*</sup>

<sup>1</sup> *Engineering Research Center of Agricultural Microbiology Technology, Ministry of Education, Heilongjiang University, Harbin 150080, China*

<sup>2</sup> *Key Laboratory of Microbiology, College of Heilongjiang Province, School of Life Science, Heilongjiang University, Harbin 150080, China*

<sup>3</sup> *Guangdong Key Laboratory of Nanomedicine, Center for Reproduction and Health Development, Institute of Biomedicine and Biotechnology, Shenzhen Institutes of Advanced Technology, Chinese Academy of Sciences, Shenzhen 518052, China*

<sup>4</sup> *School of Pharmaceutical Sciences, Key Laboratory of Bioorganic Phosphorus Chemistry & Chemical Biology (Ministry of Education), Beijing Advanced Innovation Center for Structural Biology, Tsinghua University, Beijing 100084, China*

<sup>5</sup> *Key Laboratory of Chemical Engineering Process and Technology for High-efficiency Conversion, College of Chemistry and Material Sciences, Heilongjiang University, Harbin 150080, China*

**Running title:** Targeted delivered with pICSA-BP guided DGL

\* Correspondence: zybin395@126.com (K.Z.); xj.fan@telomerescitech.com (X.F.); Tel.:

+86-451-86608586 (K.Z.); +86-755-86392360 (X.F.)

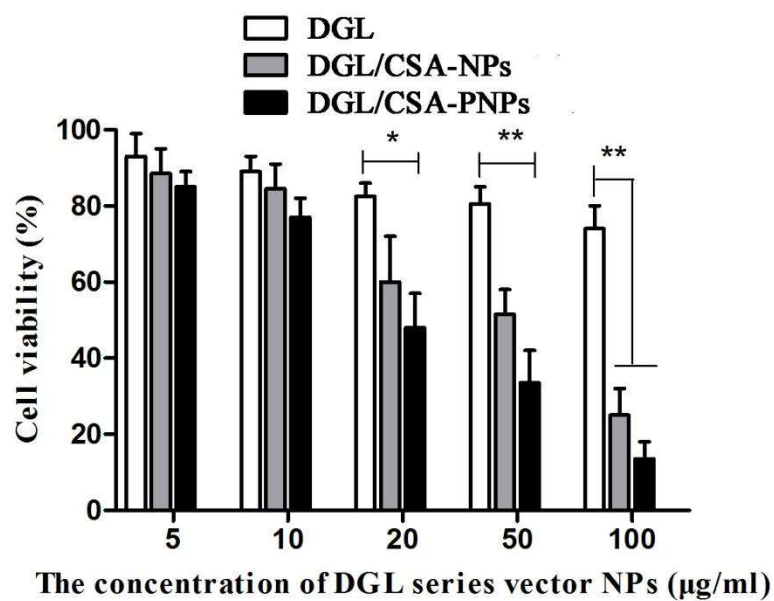

**Figure S1.** *In vitro* cell cytotoxicity evaluation of the DGL, DGL/CSA-NPs and DGL/CSA-PNPs. The cell viability measured by CCK-8 Kit performed 3 h in 293T cells after treated with DGL, DGL/CSA-NPs and DGL/CSA-PNPs at different concentrations. Data are presented as the mean  $\pm$  standard deviation (n=4). “\*” and “\*\*” indicate statistically significant difference at  $P < 0.05$  and  $P < 0.01$  (Student's *t* test), respectively.

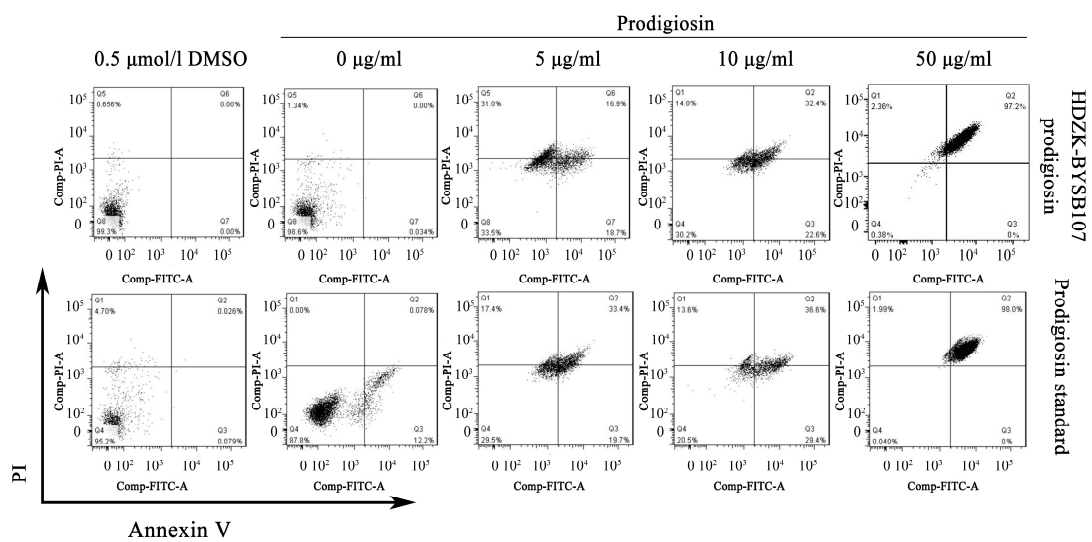

**Figure S2.** Prodigiosin from strain HDZK-BYSB107 and prodigiosin standard induced annexin V-based apoptosis in JEG3 cells *in vitro*. Representative flow cytometry-based dose response of apoptosis profiles of annexin V/PI staining for JEG3 cells. Cells were treated with 0.5 μmol/l DMSO, 0, 5, 10, and 50 μg/ml prodigiosin for 24 h.



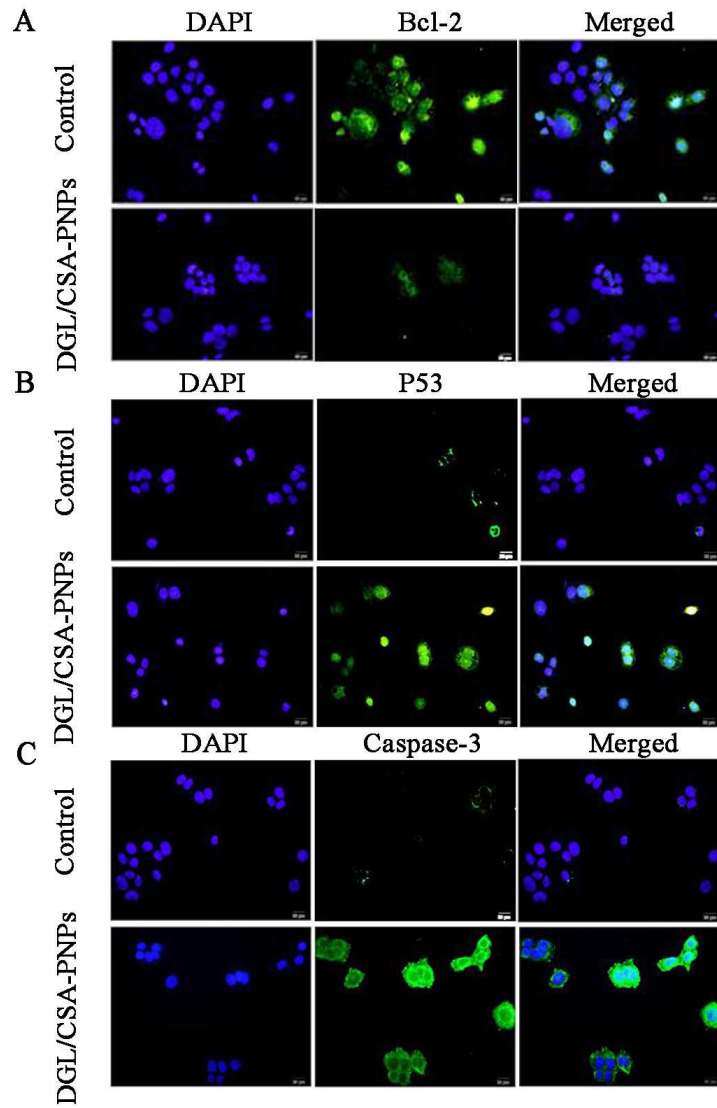

**Figure S3.** Immunofluorescence assay of bcl-2, P53 and caspase-3 induced by the DGL/CSA-PNPs in JEG3 cells. The DGL/CSA-PNPs induces up regulation of P53 (B), caspase-3 (C) and down regulation of bcl-2 (A) in JEG3 cells. Scale bar=50  $\mu\text{m}$ .

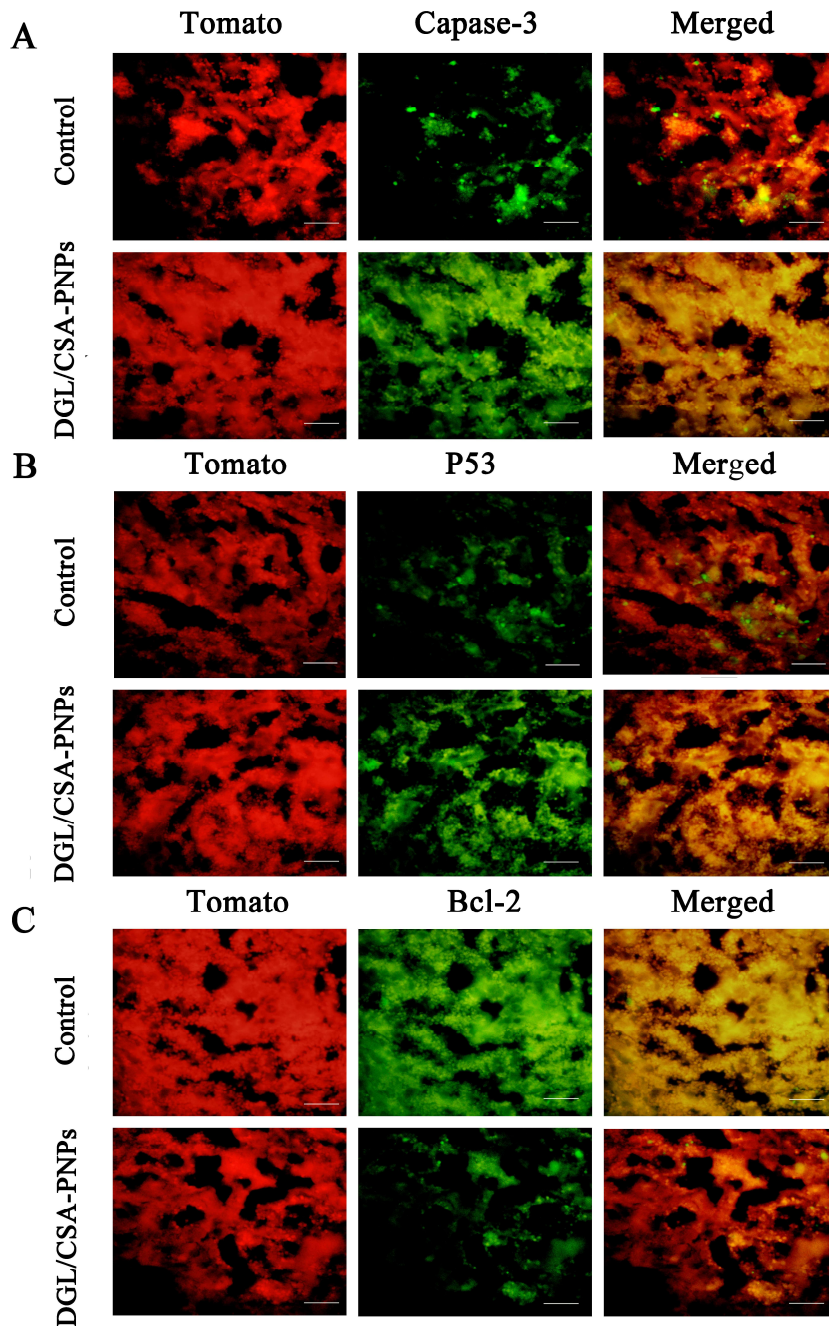

**Figure S4.** Immunofluorescence colocalization analysis of caspase-3, P53 and bcl-2 apoptosis pathway that induced by DGL/CSA-PNPs in JEG3 tumor that treated with DGL/CSA-PNPs and control group. DGL/CSA-PNPs induce up regulation of caspase-3 (A), P53 (B) and down regulation of bcl-2 (C) in JEG3 tumor. Scale bar=20  $\mu$ m.
